# Supplementary material for: Perceived Causes and Diagnosis of Febrile Convulsion in Selected Rural Contexts in Cape Coast Metropolis, Ghana
Source: Research Square preprint supplement (doi:10.21203/rs.3.rs-929178/v1), 2021-09-28
Supplement: Supplementary file 1 [file fe40ebc2d57e97acd9cb01fe.docx]

**Table 1: Background Characteristics of study participants**

| **Characteristics** | **Participant Categories** | | | | | |  | |
| --- | --- | --- | --- | --- | --- | --- | --- | --- |
| **Mother**  **(26)** | **Father (1)** | **Grand-mother (2)** | **Herbalist (4)** | **THP (7)** | **Faith healer (2)** | | **Total**  **(42)** | |
| **Sex** |  |  |  |  |  |  | |  | |
| Female | 26 | - | 2 | 3 | - | 2 | | 33 | |
| Male | - | 1 | - | 1 | 7 | - | | 9 | |
| **Age Group (in years)** |  |  |  |  |  |  | |  | |
| 20-29 | 6 | - | - | - | - | - | | 6 | |
| 30-39 | 12 | - | - | - | - | - | | 12 | |
| 40-49 | 7 | - | - | - | - | - | | 7 | |
| 50-59 | 1 | 1 |  | 1 | 2 |  | | 5 | |
| 60-69 | - | - | 1 | 2 | 3 | 1 | | 7 | |
| 70-79 | - | - | 1 | 1 | 2 | 1 | | 5 | |
| **Religious Affiliation** |  |  |  |  |  |  | |  | |
| Christian | 26 | 1 | 2 | 1 | - | 2 | | 32 | |
| Traditionalist | - | - | - | 3 | 7 | - | | 10 | |
| **Marital Status** |  |  |  |  |  |  | |  | |
| Married | 16 | - | - | 1 | 6 | - | | 23 | |
| Divorced | 9 | 1 | - | 2 | - | - | | 12 | |
| Widowed | 1 | - | 2 | 1 | 1 | 2 | | 7 | |
| **Educational Level** |  |  |  |  |  |  | |  | |
| No formal educ. | 6 | 1 | 1 | 2 | 5 | 2 | | 17 | |
| Primary | 14 | - | 1 | 2 | 2 | - | | 19 | |
| SSS/SHS | 6 | - | - | - | - | - | | 6 | |
| **Ethnic affiliation** |  |  |  |  |  |  | |  | |
| Akan | 24 | 1 | 2 | 3 | 5 | 2 | | 37 | |
| Ewe | 1 | - | - | 1 | 2 |  | | 4 | |
| Togolese | 1 | - | - | - | - | - | | 1 | |
| **Duration of Practice** |  |  |  |  |  |  | |  | |
| 30-39 years | *na | na | Na | 4 | 4 | - | | 8 | |
| 40-49 years | - | - | - | - | 3 | 2 | | 5 | |

Source:Fieldwork, 2020 | *na denotes not applicable|

## Table 2: Perceived causes of febrile convulsion

| Themes | Perceived Cause of FC | Count |
| --- | --- | --- |
| - Biological/Natural | - High body temperature - Congenital abnormalities | 31  4 |
| - Social | - Poor nutrition - Poor child care practices | 37  6 |
| - Spiritual | - Evil spirits/Attacks | 24 |
